# Supplementary material
Source: MDPI journal article supplement (https://www.mdpi.com/2073-4344/14/3/191)
Supplement: s1 [file s1]

## Supporting information for

# CuSnBi catalyst grown on copper foam by co-electrodeposition for efficient electrochemical reduction of CO<sub>2</sub> to formate

Hangxin Xie<sup>1,2</sup>, Li Lv<sup>2\*</sup>, Yuan Sun<sup>2</sup>, Chunlai Wang<sup>2</sup>, Jialin Xu<sup>1,2</sup>, Min Tang<sup>1\*</sup>

1. School of Light Industry and Engineering, South China University of Technology, Guangzhou 510640, China;

2. State Key Laboratory of NBC Protection for Civilian, Beijing 100025, China

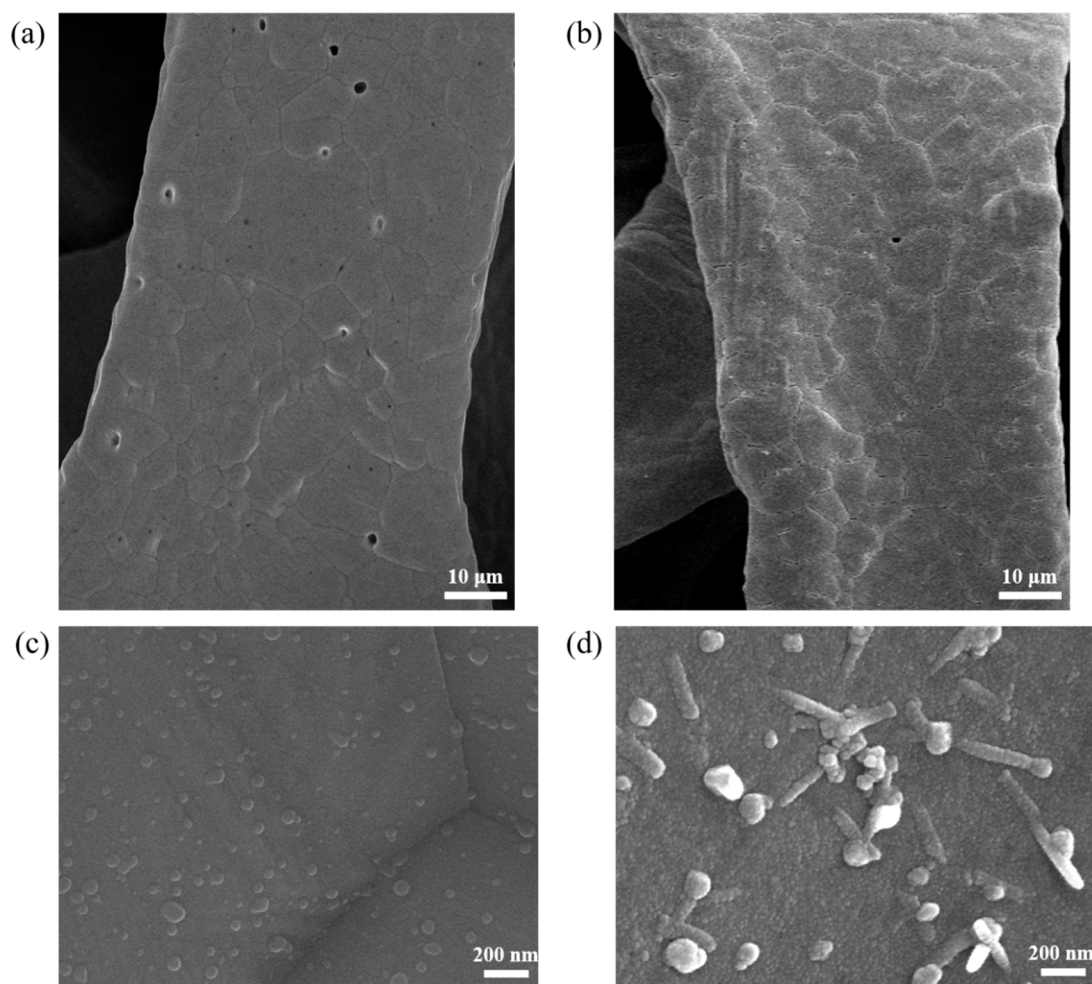

**Figure S1.** SEM image of (a) and (c) original Cu foam, (b) and (d) pretreated Cu foam

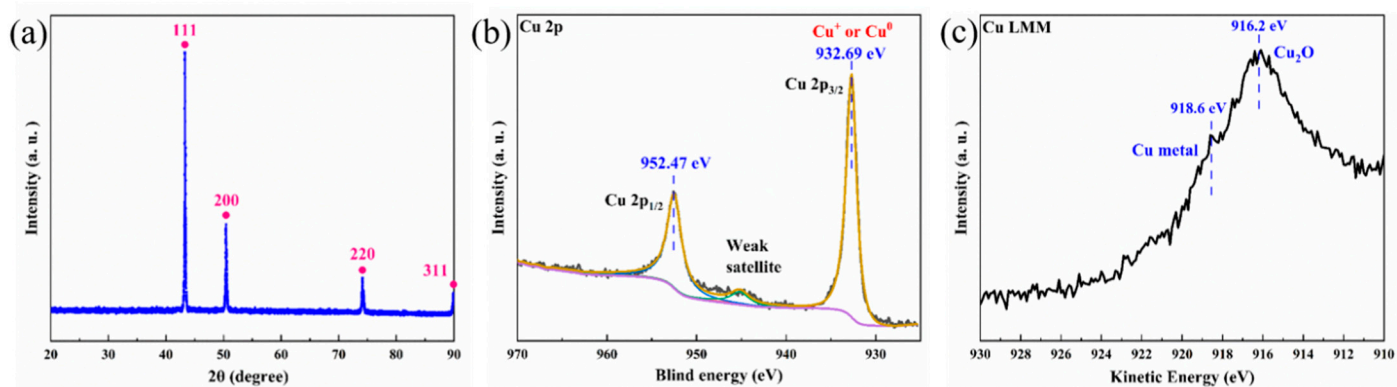

**Figure S2.** Spectrum of the derived Cu foam. (a) XRD patterns, (b) XPS fine spectra of Cu and (c) Auger spectra of Cu.

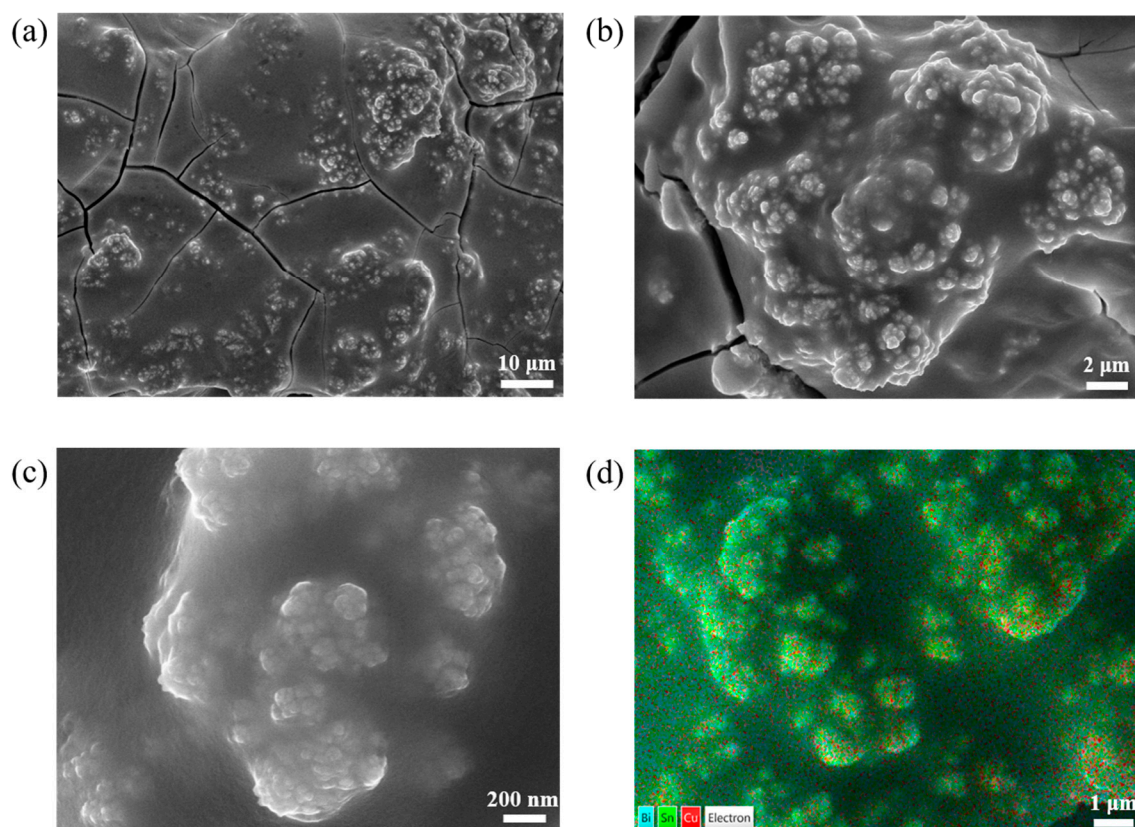

**Figure S3.** SEM images of the CuSnBi-1-pH7.5 electrode with scale bars of (a) 10 μm, (b) 2 μm, and (c) 200 nm. (d) Elemental map (Bi is blue, Sn is green, and Cu is red).

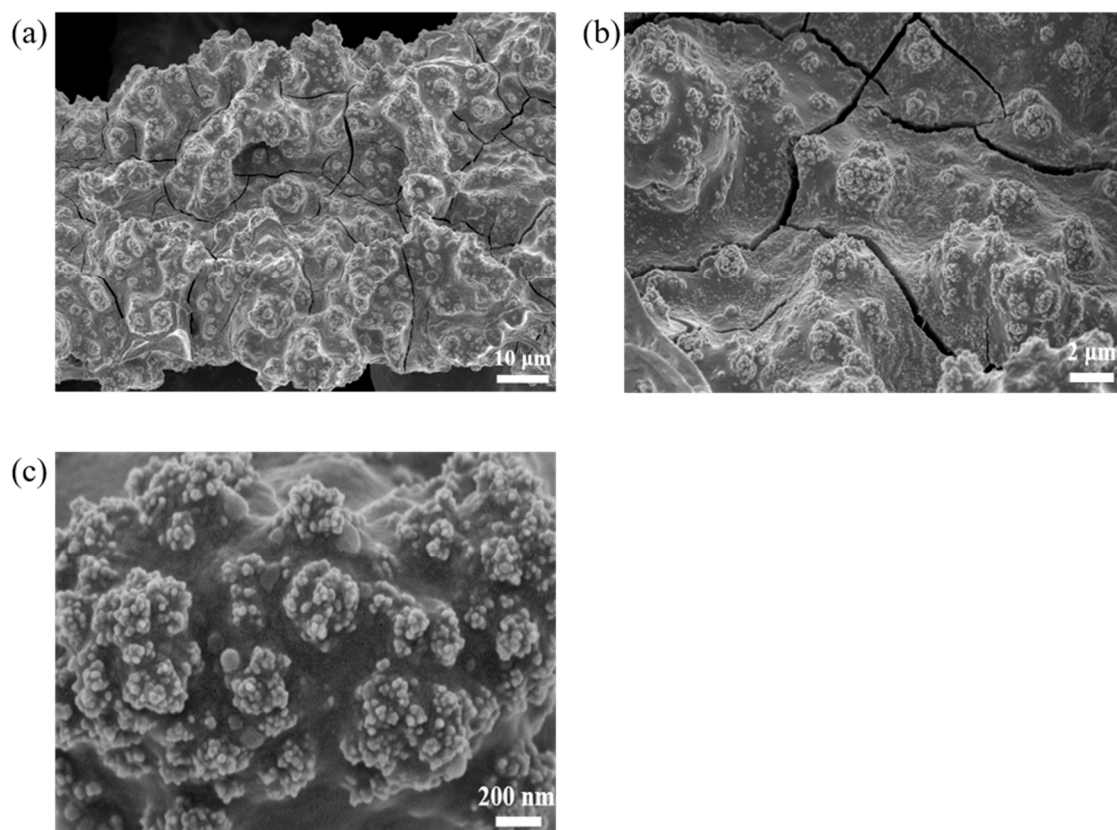

**Figure S4.** SEM images of the CuSnBi-1-pH8.0 electrode with scale bars of (a) 10  $\mu\text{m}$ , (b) 2  $\mu\text{m}$ , and (c) 200 nm.

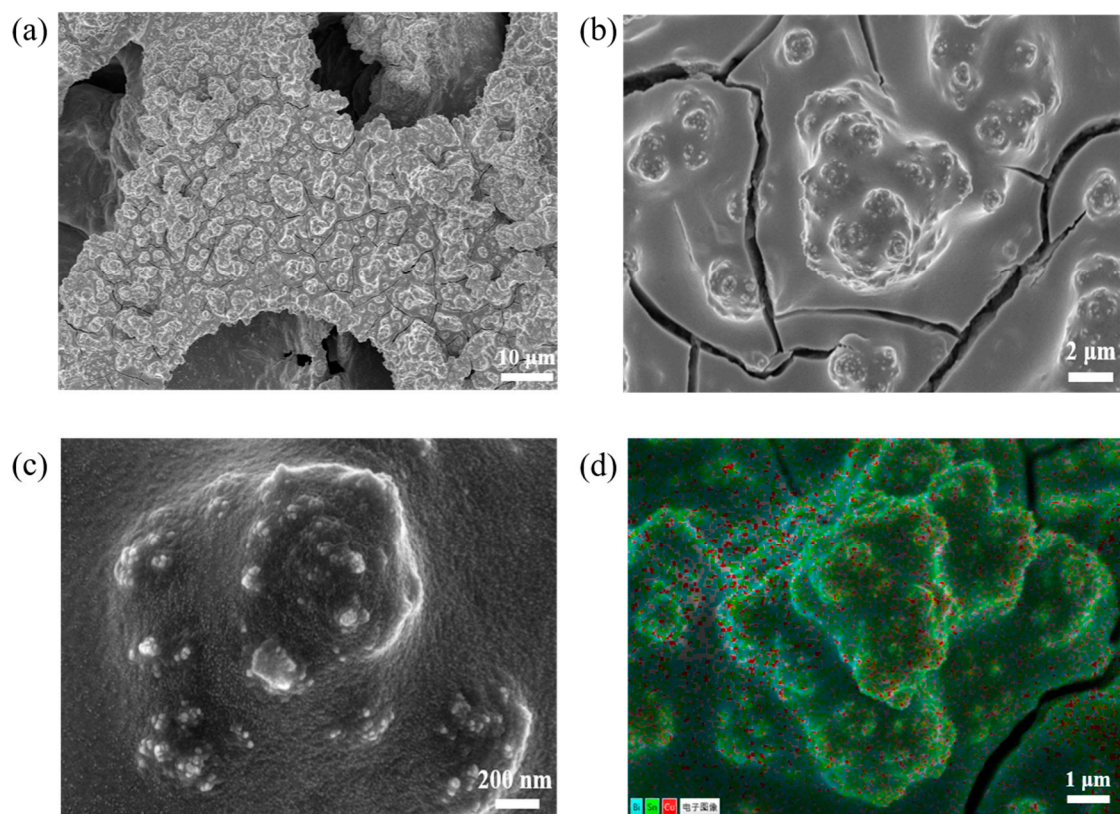

**Figure S5.** SEM images of the CuSnBi-1-pH9.0 electrode with scale bars of (a) 10  $\mu\text{m}$ , (b) 2  $\mu\text{m}$ , and (c) 200 nm. (d) Elemental map (Bi is blue, Sn is green, and Cu is red).



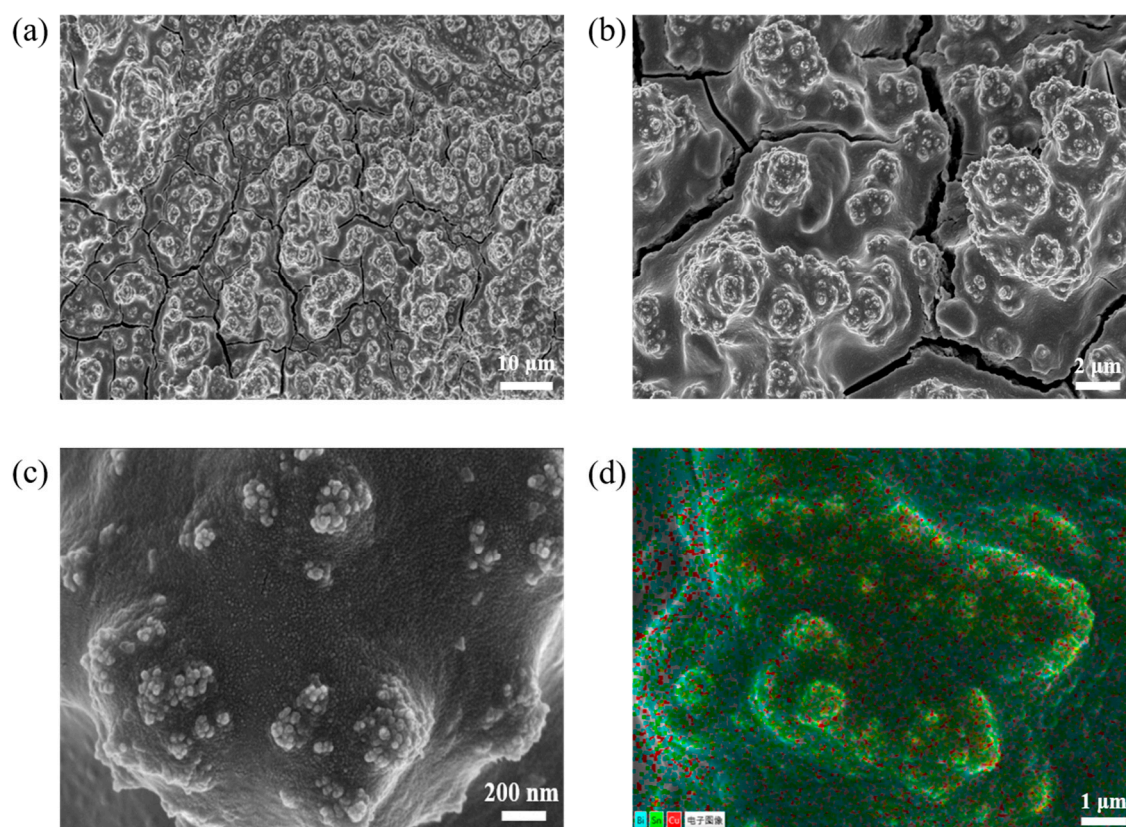

**Figure S6.** SEM images of the CuSnBi-1-pH9.5 electrode with scale bars of (a) 10 μm, (b) 2 μm, and (c) 200 nm. (d) Elemental map (Bi is blue, Sn is green, and Cu is red).

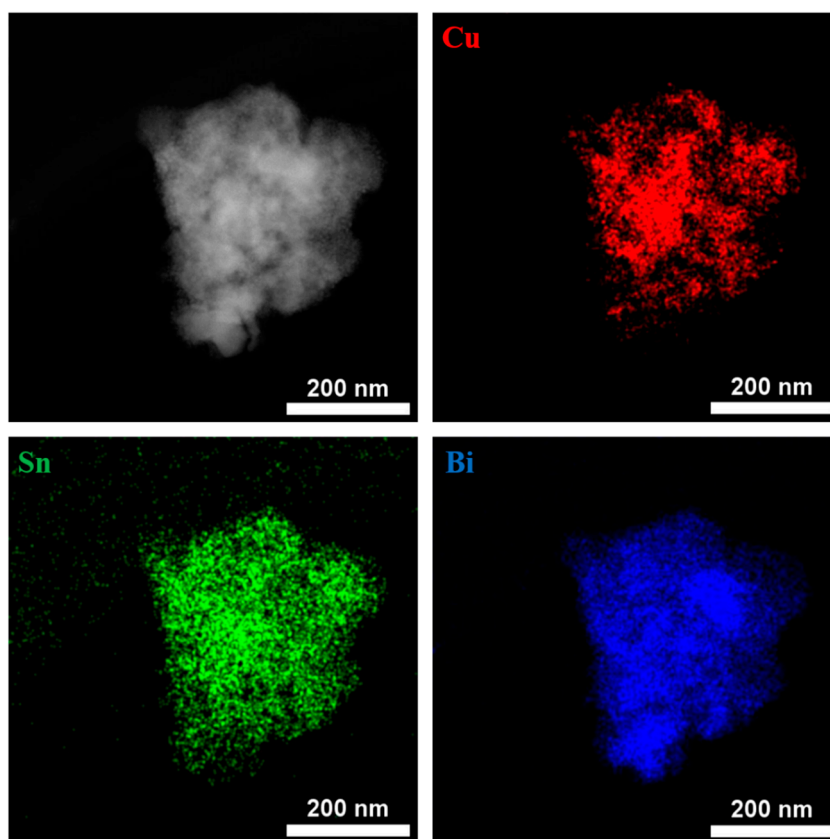

**Figure S7.** TEM-EDS mapping results of CuSnBi-1-pH8.5 electrode.

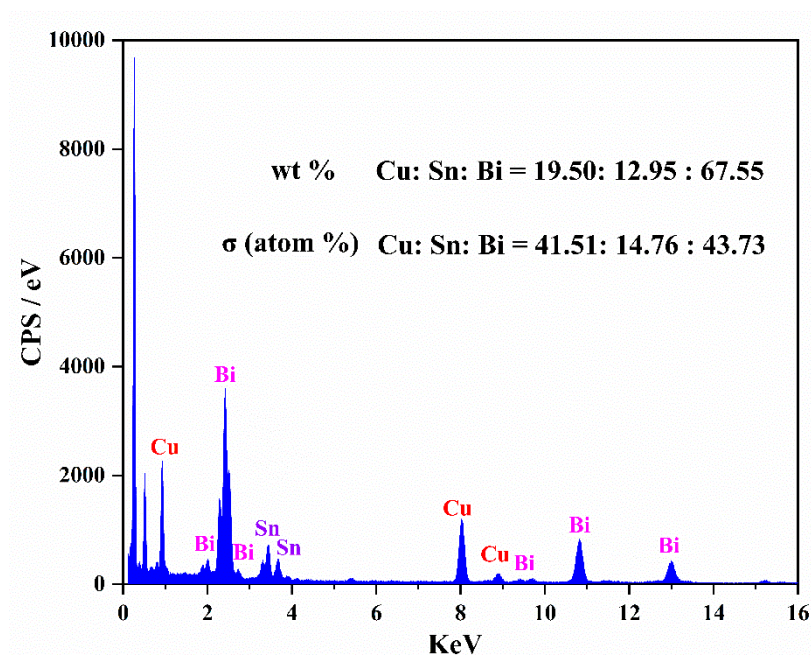

Figure S8. TEM-EDS spectrum of CuSnBi-1-pH8.5 electrode.

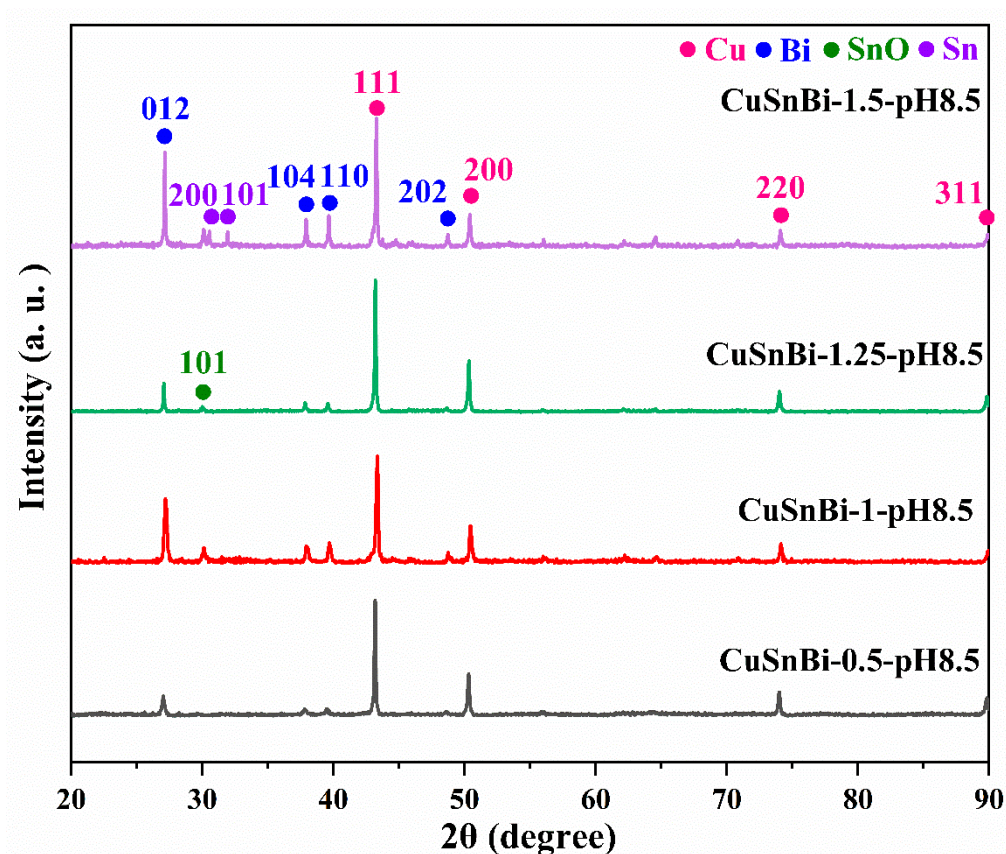

Figure S9. XRD patterns of the CuSnBi- $x$ -pH8.5 electrodes prepared at different molar ratios of  $\text{Cu}^{2+}/\text{Sn}^{2+}/\text{Bi}^{3+}$  in electrodeposition solution.

**Table S1.** Percentage of bismuth and tin species in CuSnBi-1-pHy electrodes prepared at different pH values

| Electrode            | CuSnBi-1-p<br>H7.5 | CuSnBi-1-p<br>H8.0 | CuSnBi-1-p<br>H8.5 | CuSnBi-1-p<br>H9.0 | CuSnBi-1-p<br>H9.5 |
|----------------------|--------------------|--------------------|--------------------|--------------------|--------------------|
| Sn <sup>0</sup> (%)  | 8.72               | 0                  | 0                  | 0                  | 8.96               |
| SnO <sub>x</sub> (%) | 29.53              | 37.19              | 31.74              | 34.06              | 45.65              |
| Bi <sup>0</sup> (%)  | 12.01              | 8.04               | 6.33               | 7.04               | 13.56              |
| Bi <sup>3+</sup> (%) | 49.74              | 54.77              | 62.03              | 58.9               | 31.83              |
| Sn: Bi               | 1: 1.61            | 1: 1.69            | 1: 2.15            | 1: 1.94            | 1: 0.83            |

**Table S2.** Percentage of metal species in the CuSnBi-1-pH8.5 electrode before and after the stability test

| Electrode           | Cu <sup>0</sup> (%) | Cu <sup>2+</sup> (%) | SnO <sub>x</sub> (%) | Bi <sup>0</sup> (%) | Bi <sup>3+</sup> (%) |
|---------------------|---------------------|----------------------|----------------------|---------------------|----------------------|
| Before the reaction | 0                   | 0                    | 31.74                | 6.33                | 62.03                |
| After the reaction  | 20.68               | 35.79                | 9.42                 | 1.66                | 32.45                |

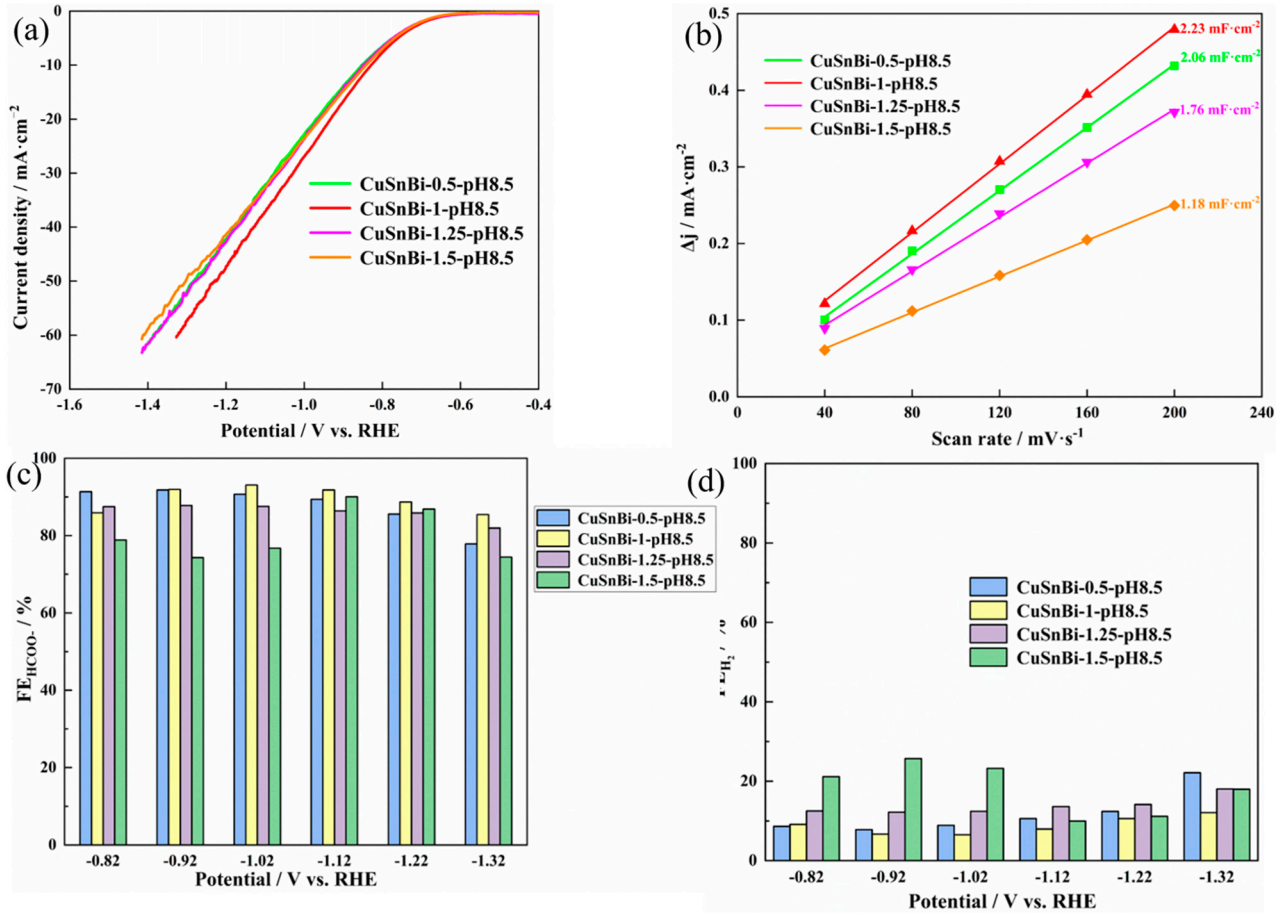

**Figure S10.** Electrochemical characterization of CuSnBi-x-pH8.5 electrodes prepared at different molar ratios of Cu<sup>2+</sup>/Sn<sup>2+</sup>/Bi<sup>3+</sup>. (a) LSV, (b) Cdl, (c) FE<sub>HCOO-</sub> and (d) FE<sub>H2</sub>

**Table S3.** Fitting equivalent circuit parameters in CuSnBi-1-pHy electrodes prepared at different pH values

| Electrode      | CuSnBi-1-p<br>H7.5 | CuSnBi-1-p<br>H8.0 | CuSnBi-1-p<br>H8.5 | CuSnBi-1-p<br>H9.0 | CuSnBi-1-p<br>H9.5 |
|----------------|--------------------|--------------------|--------------------|--------------------|--------------------|
| Ri / $\Omega$  | 3.61               | 5.81               | 2.93               | 4.32               | 3.21               |
| Rct / $\Omega$ | 13.20              | 14.55              | 11.53              | 11.99              | 17.33              |

**Table S4.** Fitting equivalent circuit parameters in CuSnBi-x-pH8.5 electrodes prepared at different molar ratios of Cu<sup>2+</sup>/Sn<sup>2+</sup>/Bi<sup>3+</sup> in electrodeposition solution.

| Electrode      | CuSnBi-0.5-<br>pH8.5 | CuSnBi-1-p<br>H8.0 | CuSnBi-1.25<br>-pH8.5 | CuSnBi-1.5-<br>pH9.0 |
|----------------|----------------------|--------------------|-----------------------|----------------------|
| Ri / $\Omega$  | 3.72                 | 2.93               | 3.72                  | 3.51                 |
| Rct / $\Omega$ | 16.41                | 11.53              | 15.70                 | 13.68                |

**Table S5** Performance summary of recent ternary metal catalysts for electrochemical reduction of carbon dioxide

| Catalysts | Product         | FE <sub>max</sub> (%) | Current density<br>(mA·cm <sup>-2</sup> ) | Stability (h) | Ref  |
|-----------|-----------------|-----------------------|-------------------------------------------|---------------|------|
| PbBiSn    | Formate         | 30                    | 30                                        | -             | [47] |
| PdSnPb    | Formate         | 73                    | 35                                        | 3             | [48] |
| PdSnIn    | Formate         | 38                    | 35                                        | 3             | [48] |
| BiSnPb    | Formate         | 60                    | 31                                        | 24            | [49] |
| CuZnMo    | Methanol        | 25                    | 13                                        | 3             | [50] |
| CuSnZn    | Carbon monoxide | 85                    | 10                                        | 4             | [51] |
| ZnAlCe    | Carbon monoxide | 89                    | 24                                        | 5             | [52] |
| CuZnAl    | Carbon monoxide | 25                    | 15                                        | -             | [53] |
| This work | Formate         | 91.79                 | 36.6                                      | 20            |      |
